# Supplementary material for: Effects of atmospheric transport and trade on air pollution mortalityin China
Source: Copernicus journal article supplement (doi:10.5194/acp-2017-263), 2017-03-22
Supplement: Supplementary file [file acp-2017-263-AC2-supplement.pdf]

## Referee #2

This is an important paper that worth publication. Author contribute the knowledge about the domestic transfer of the trade related air pollution and associated health impacts (calculated by the premature deaths). The methodology is mature and robust and the results are of great interests given the fact that China's air-pollution is currently the most timing issue. Several minor revision suggestions:

**Response:** We thank Referee #2 for the positive comments. Responses to each point are addressed as below.

1. Definition of premature deaths, author should explain how the deaths are defined, my understanding is that the people are not directly "killed" by air pollution, it should be the shorten of expected life time, this need be clarify in the main text.

**Response:** Thanks for the comments. In this work, we estimated the premature mortality related to air pollution, that is, death of an individual before his or her life expectancy due to exposure to air pollution. We have clarified this in the revised manuscript.

2. Given that only the domestic Input-output models are used in the analysis, author need to explain the impacts of international trade and related uncertainties.

**Response:** Thanks for the comments. In the Sect. 3.4 of the revised manuscript, we discussed the limitations due to using the domestic MRIO.

3. Improve the policy implications in terms of how the trade policy can contribute to pollution mitigation.

**Response:** Thanks for the comments. We have strengthened the policy discussions in the Sect. 4 of the revised manuscript.
